# Supplementary material for: The monoaminergic system is a bilaterian innovation
Source: PubMed Central journal article supplement (PMC10244343; doi:10.1038/s41467-023-39030-2), 2023-06-06
Supplement: 41467_2023_39030_MOESM4_ESM.pdf [file 41467_2023_39030_MOESM4_ESM.pdf]

## Reporting Summary

Nature Portfolio wishes to improve the reproducibility of the work that we publish. This form provides structure for consistency and transparency in reporting. For further information on Nature Portfolio policies, see our [Editorial Policies](#) and the [Editorial Policy Checklist](#).

### Statistics

For all statistical analyses, confirm that the following items are present in the figure legend, table legend, main text, or Methods section.

n/a Confirmed

- The exact sample size ( $n$ ) for each experimental group/condition, given as a discrete number and unit of measurement
- A statement on whether measurements were taken from distinct samples or whether the same sample was measured repeatedly
- The statistical test(s) used AND whether they are one- or two-sided  
*Only common tests should be described solely by name; describe more complex techniques in the Methods section.*
- A description of all covariates tested
- A description of any assumptions or corrections, such as tests of normality and adjustment for multiple comparisons
- A full description of the statistical parameters including central tendency (e.g. means) or other basic estimates (e.g. regression coefficient) AND variation (e.g. standard deviation) or associated estimates of uncertainty (e.g. confidence intervals)
- For null hypothesis testing, the test statistic (e.g.  $F$ ,  $t$ ,  $r$ ) with confidence intervals, effect sizes, degrees of freedom and  $P$  value noted  
*Give  $P$  values as exact values whenever suitable.*
- For Bayesian analysis, information on the choice of priors and Markov chain Monte Carlo settings
- For hierarchical and complex designs, identification of the appropriate level for tests and full reporting of outcomes
- Estimates of effect sizes (e.g. Cohen's  $d$ , Pearson's  $r$ ), indicating how they were calculated

*Our web collection on [statistics for biologists](#) contains articles on many of the points above.*

### Software and code

Policy information about [availability of computer code](#)

Data collection

No software was used for the data collection

## Data analysis

Trinity v2.8.4  
 Transdecoder  
 BUSCO v4.0.5  
 KEGG  
 EggNOG v5.0  
 BLASTP v2.9.0  
 CD-HIT v4.6.6  
 Broccoli v1.1  
 InterProScan v5.46.81  
 Phobius v1.01  
 CLANS  
 MAFFT v7.49  
 PhyKIT v1.11.7  
 TrimAl v1.4.1  
 IQ-TREE2 v2.1.4\_beta/v2.1.3  
 Generax v2.0.1  
 recphyloXML v1.0.7  
 RogueNaRok v1.0

For manuscripts utilizing custom algorithms or software that are central to the research but not yet described in published literature, software must be made available to editors and reviewers. We strongly encourage code deposition in a community repository (e.g. GitHub). See the Nature Portfolio [guidelines for submitting code & software](#) for further information.

## Data

Policy information about [availability of data](#)

All manuscripts must include a [data availability statement](#). This statement should provide the following information, where applicable:

- Accession codes, unique identifiers, or web links for publicly available datasets
- A description of any restrictions on data availability
- For clinical datasets or third party data, please ensure that the statement adheres to our [policy](#)

Data underlying this study is provided in the figshare repositories with accessions: .

## Research involving human participants, their data, or biological material

Policy information about studies with [human participants or human data](#). See also policy information about [sex, gender \(identity/presentation\), and sexual orientation](#) and [race, ethnicity and racism](#).

Reporting on sex and gender

N/A

Reporting on race, ethnicity, or other socially relevant groupings

N/A

Population characteristics

N/A

Recruitment

N/A

Ethics oversight

N/A

Note that full information on the approval of the study protocol must also be provided in the manuscript.

## Field-specific reporting

Please select the one below that is the best fit for your research. If you are not sure, read the appropriate sections before making your selection.

Life sciences  Behavioural & social sciences  Ecological, evolutionary & environmental sciences

For a reference copy of the document with all sections, see [nature.com/documents/nr-reporting-summary-flat.pdf](https://nature.com/documents/nr-reporting-summary-flat.pdf)

## Ecological, evolutionary & environmental sciences study design

All studies must disclose on these points even when the disclosure is negative.

Study description

We present a phylogenomic investigation of the genes involved in the monoaminergic system in animals

Research sample

Our study aimed to investigate the evolutionary history of the monoaminergic system in animals. To achieve this, we used a large taxonomical sampling including 47 animals' species (including 21 non-bilaterian species), 18 opisthokonts, and 34 other eukaryotes.

|                          |                                                                                                                                                                                                                                                                                                                                                                                                                                                                                                                                                                                                        |
|--------------------------|--------------------------------------------------------------------------------------------------------------------------------------------------------------------------------------------------------------------------------------------------------------------------------------------------------------------------------------------------------------------------------------------------------------------------------------------------------------------------------------------------------------------------------------------------------------------------------------------------------|
|                          | The genomic data were obtained from NCBI and ENSEMBL and was carefully curated to ensure that it was phylogenetically representative and comprehensive                                                                                                                                                                                                                                                                                                                                                                                                                                                 |
| Sampling strategy        | We manually selected species with publicly available genomes prioritizing those from different phylogenetic groups (particularly focusing on non-bilaterian animals). We only chose genomes with a high level of completeness (above 75%) according to BUSCO, exceptions were made for species of interest with no alternatives or closely related species. To further increase sampling of non-bilaterian animals we included de novo assembled transcription data for several cnidarian species. We limited sampling to 101 species as more would prove too large for timely computational analyses. |
| Data collection          | R.F. and M.G. manually downloaded NCBI and ENSEMBL accessions to retrieve the sequence data (see Supplementary Data 2)                                                                                                                                                                                                                                                                                                                                                                                                                                                                                 |
| Timing and spatial scale | Transcriptomic and genomic samples were retrieved from public repositories during 2019, 2020 and 2021                                                                                                                                                                                                                                                                                                                                                                                                                                                                                                  |
| Data exclusions          | No data were excluded from the analysis.                                                                                                                                                                                                                                                                                                                                                                                                                                                                                                                                                               |
| Reproducibility          | Not applicable as this was a phylogenomic study                                                                                                                                                                                                                                                                                                                                                                                                                                                                                                                                                        |
| Randomization            | Not applicable as this was a phylogenomic study                                                                                                                                                                                                                                                                                                                                                                                                                                                                                                                                                        |
| Blinding                 | Not applicable as this was a phylogenomic study                                                                                                                                                                                                                                                                                                                                                                                                                                                                                                                                                        |

Did the study involve field work?  Yes  No

## Reporting for specific materials, systems and methods

We require information from authors about some types of materials, experimental systems and methods used in many studies. Here, indicate whether each material, system or method listed is relevant to your study. If you are not sure if a list item applies to your research, read the appropriate section before selecting a response.

### Materials & experimental systems

| n/a                                 | Involved in the study                                  |
|-------------------------------------|--------------------------------------------------------|
| <input checked="" type="checkbox"/> | <input type="checkbox"/> Antibodies                    |
| <input checked="" type="checkbox"/> | <input type="checkbox"/> Eukaryotic cell lines         |
| <input checked="" type="checkbox"/> | <input type="checkbox"/> Palaeontology and archaeology |
| <input checked="" type="checkbox"/> | <input type="checkbox"/> Animals and other organisms   |
| <input checked="" type="checkbox"/> | <input type="checkbox"/> Clinical data                 |
| <input checked="" type="checkbox"/> | <input type="checkbox"/> Dual use research of concern  |
| <input checked="" type="checkbox"/> | <input type="checkbox"/> Plants                        |

### Methods

| n/a                                 | Involved in the study                           |
|-------------------------------------|-------------------------------------------------|
| <input checked="" type="checkbox"/> | <input type="checkbox"/> ChIP-seq               |
| <input checked="" type="checkbox"/> | <input type="checkbox"/> Flow cytometry         |
| <input checked="" type="checkbox"/> | <input type="checkbox"/> MRI-based neuroimaging |
